# Supplementary material
Source: MDPI journal article supplement (https://www.mdpi.com/2218-6581/13/5/79)
Supplement: s1 [file s1]

Archive with 1 entries (1 files):
- robotics-2919117-supplementary.pdf
